# Supplementary material for: Prokaryotic Expression, Purification, and Antibacterial Activity of the Hepcidin Peptide of Crescent Sweetlips (Plectorhinchus cinctus)
Source: MDPI journal article supplement (doi:10.3390/cimb45090456), 2023-08-31

**Table S1.** Factors and levels in the RSM experimental design.

| Factors                      | Code | Code Level |     |     |
|------------------------------|------|------------|-----|-----|
|                              |      | -1         | 0   | 1   |
| IPTG concentrations (mmol/L) | A    | 0.1        | 0.2 | 0.3 |
| Induction time (h)           | B    | 12         | 16  | 20  |
| Induction temperatures (°C)  | C    | 15         | 20  | 25  |

**Table S2.** Experimental design used in RSM studies and responses for the optimization of induction conditions.

| Run Number | Coded Variables |    |    | Gray Values |
|------------|-----------------|----|----|-------------|
|            | A               | B  | C  | Y           |
| 1          | 0               | 0  | 0  | 27.38       |
| 2          | 1               | -1 | 0  | 19.15       |
| 3          | 0               | 0  | 0  | 26.22       |
| 4          | -1              | -1 | 0  | 19.51       |
| 5          | -1              | 1  | 0  | 16.31       |
| 6          | 1               | 1  | 0  | 19.29       |
| 7          | 0               | 0  | 0  | 27.37       |
| 8          | 1               | 0  | 1  | 15.46       |
| 9          | 0               | 0  | 0  | 27.39       |
| 10         | 0               | 0  | 0  | 27.21       |
| 11         | 1               | 0  | -1 | 21.89       |
| 12         | 0               | 1  | -1 | 20.77       |
| 13         | -1              | 0  | -1 | 19.26       |
| 14         | 0               | 1  | 1  | 14.83       |
| 15         | 0               | -1 | 1  | 15.85       |
| 16         | 0               | -1 | -1 | 18.71       |
| 17         | -1              | 0  | 1  | 16.14       |

**Figure S1** The three-dimensional response surface plots and two-dimensional contour plots of the relative effects on gray value. (a) and (d): IPTG concentration and induction time; (b) and (e): IPTG concentration and induction temperature; (c) and (f): Induction temperature and induction time.

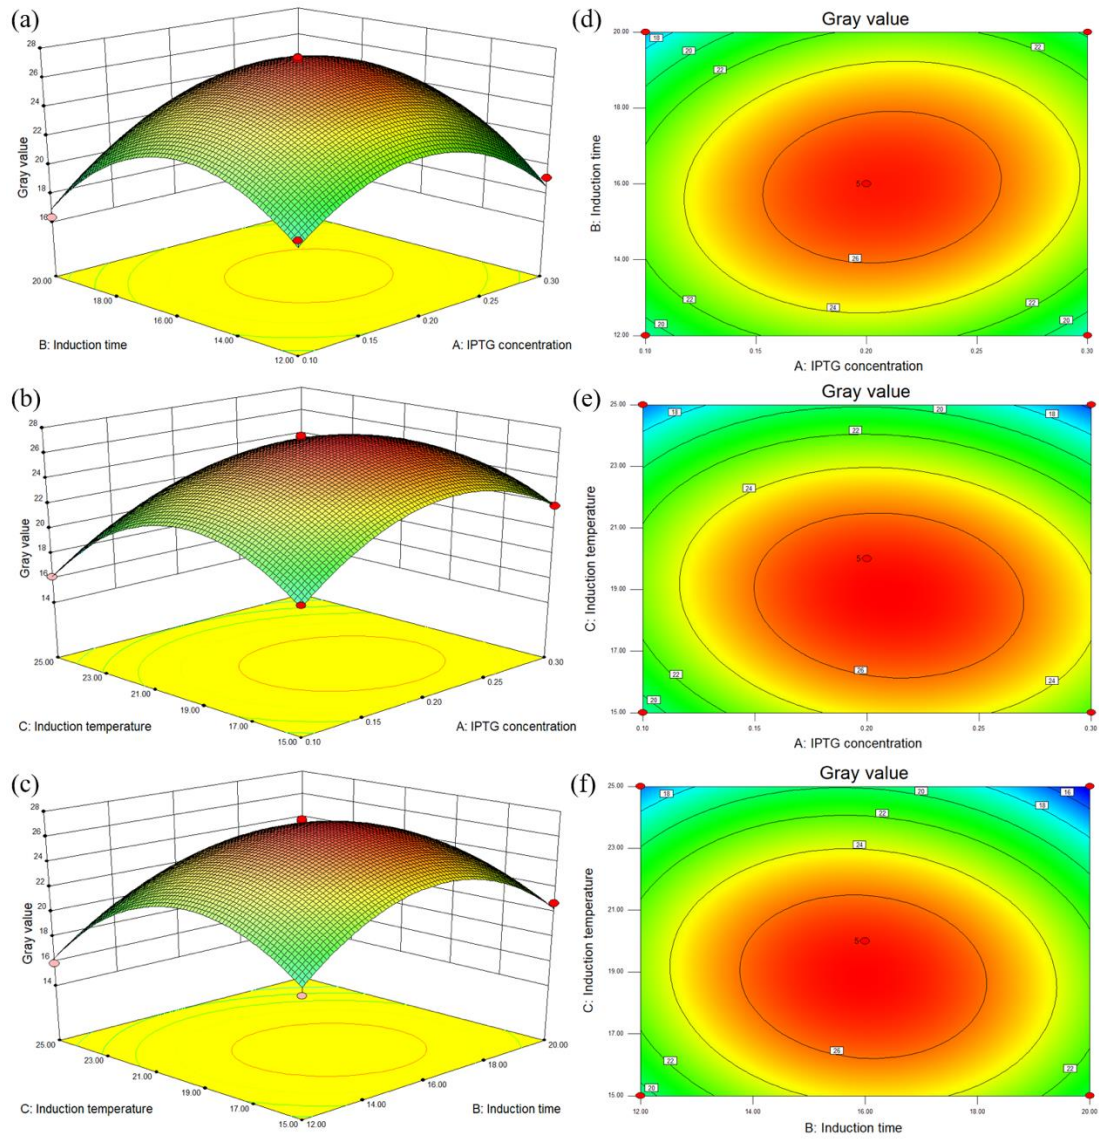

**Figure S2 The MICs of crescent sweetlips hepcidin peptides prepared by different methods.**

(a-c) The MIC of synthetic hepcidin peptide against *V. parahaemolyticus*, *E. coli*, and *S. aureus*.

(d-f) The MIC of hepcidin peptide obtained by expression system against *V. parahaemolyticus*, *E. coli*, and *S. aureus*. \*  $p < 0.05$ , compared with 0 h.

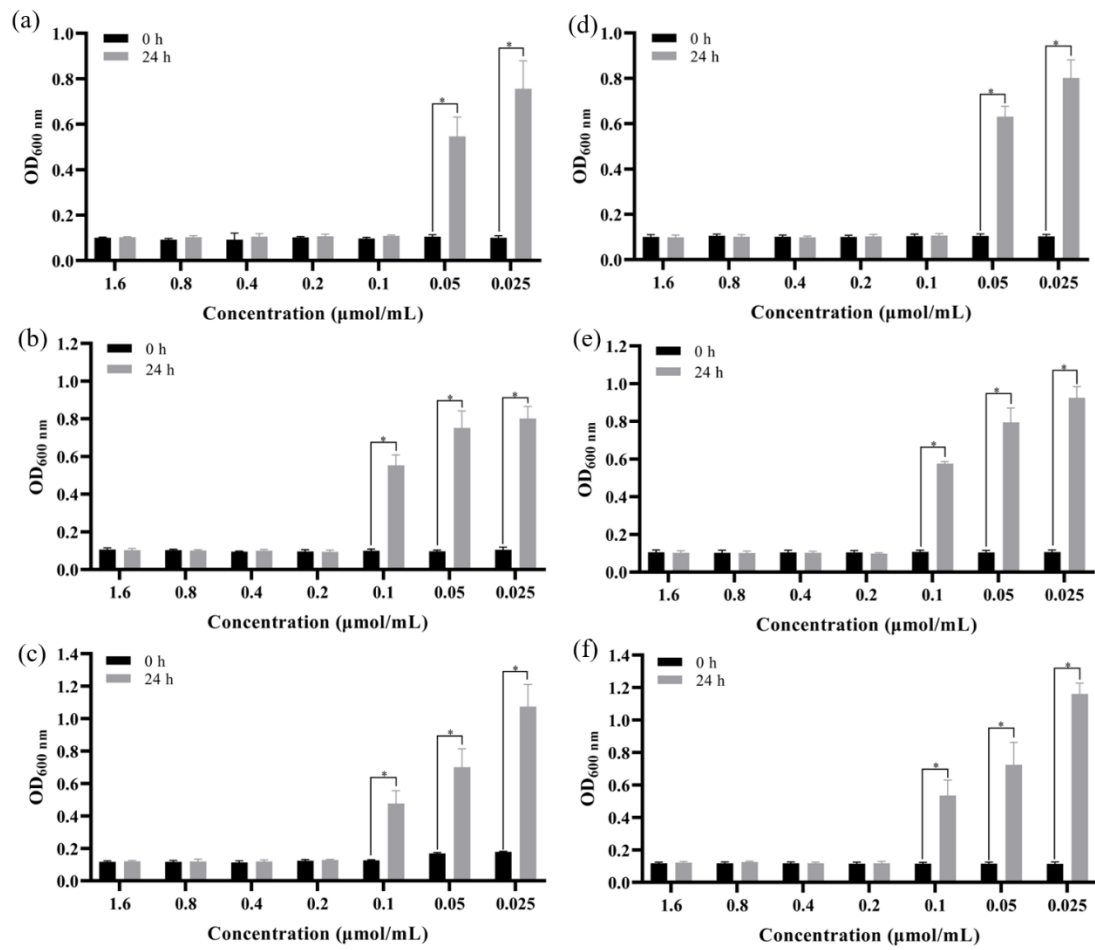

Supplement: s1 [file s1]
